1 **A terrain treadmill to study small animal locomotion through large obstacles**

2 Ratan Othayoth<sup>#</sup>, Blake Strebel<sup>#</sup>, Yuanfeng Han, Evains Francois, \*Chen Li

3 Department of Mechanical Engineering, Johns Hopkins University

4 \*Corresponding author. Email: [chen.li@jhu.edu](mailto:chen.li@jhu.edu)

5 <sup>#</sup>Equal contributions

6  
7  
8 **Abstract**

9 A major challenge to understanding locomotion in complex 3-D terrain with large obstacles is to  
10 create tools for controlled, systematic lab experiments. Existing terrain arenas only allow observations at  
11 small spatiotemporal scales (~10 body length, ~10 stride cycles). Here, we create a terrain treadmill to  
12 enable high-resolution observations of small animal locomotion through large obstacles over large  
13 spatiotemporal scales. An animal moves through modular obstacles on an inner sphere, while a rigidly-  
14 attached, concentric, transparent outer sphere rotated with the opposite velocity via closed-loop feedback  
15 to keep the animal on top. During sustained locomotion, a discoid cockroach moved through pillar obstacles  
16 for 25 minutes ( $\approx 2500$  strides) over 67 m ( $\approx 1500$  body lengths), and was contained within a radius of 4  
17 cm (0.9 body length) for 83% of the duration, even at speeds of up to 10 body length/s. The treadmill  
18 enabled observation of diverse locomotor behaviors and quantification of animal-obstacle interaction.

19

20 **Keywords**

21 Complex terrain, obstacle traversal, laboratory platform, terradynamics

22

## 23 **Introduction**

24 In nature, terrestrial animals often move through spatially complex, three-dimensional terrain <sup>1</sup>.  
25 Small animals are particularly challenged to traverse many obstacles comparable to or even larger than  
26 themselves <sup>2</sup>. By contrast, the majority of laboratory studies of terrestrial locomotion have been performed  
27 on flat surfaces <sup>3-10</sup>, either rigid or with various surface properties (friction, slope, solid area fraction,  
28 stiffness, damping, ability to deform and flow, etc.).

29 Recent laboratory studies have begun to advance our understanding of animal locomotion in  
30 complex terrain with obstacles <sup>11-16</sup>. Because of typical laboratory space constraints, the terrain arenas used  
31 in these studies are usually no larger than a few dozen body lengths in each dimension. Thus, they only  
32 allow experiments at relatively small spatiotemporal scales beyond ~10 body lengths and ~10 movement  
33 cycles. It remains a challenge to study animal locomotion in complex 3-D terrain with large obstacles at  
34 larger spatiotemporal scales.

35 Experiments at large spatiotemporal scales are usually realized by treadmills to keep the animal  
36 (including humans) stationary relative to the laboratory <sup>17-22</sup>. However, only small obstacles can be directly  
37 mounted on such treadmills <sup>23</sup>; larger obstacles have to be dropped onto the treadmill during locomotion <sup>24</sup>.  
38 Furthermore, such linear treadmills allow only untethered movement along one direction. Alternatively,  
39 spherical treadmills use lightweight spheres of low inertia suspended on air bearing (kugels) to allow small  
40 animals to rotate the spheres as they freely change their movement speed and direction, <sup>25,26</sup>. However, the  
41 animal is tethered, and obstacles cannot be used.

42 Here, we create a terrain treadmill (Fig. 1A, B) to enable large spatiotemporal scale, high-resolution  
43 observations of small animal locomotion in complex terrain with large obstacles. Our terrain treadmill  
44 design was inspired by a celestial globe model (Fig. S1). The terrain treadmill consists of a transparent,  
45 smooth, hollow, outer sphere rigidly attached to a concentric, solid, inner sphere using a connecting rod  
46 (Fig. 1A, Video 1). Terrain modules can be attached to the inner sphere (Fig. 1A, B, C) to simulate obstacles  
47 that small animals encounter in natural terrain <sup>16</sup>. The outer sphere is placed on an actuator system

48 consisting of three actuated omni-directional wheels (Fig. 1A). An overhead camera captures videos of the  
49 animal moving on top of the inner sphere, with an ArUCo<sup>27</sup> marker attached on its body. The animal's  
50 position estimated from tracking the marker is used by a feedback controller (Fig 2A) to actuate the  
51 connected spheres with the opposite velocity to keep the animal on top (Fig. 3) as it moves through the  
52 obstacle field (Fig. 4, 5, Videos 2, 3). Finally, the reconstructed 3-D motion can be used to estimated  
53 different metrics such as body velocities and antennal planar orientation relative to the body heading (Fig.  
54 6, Videos 4, 5).

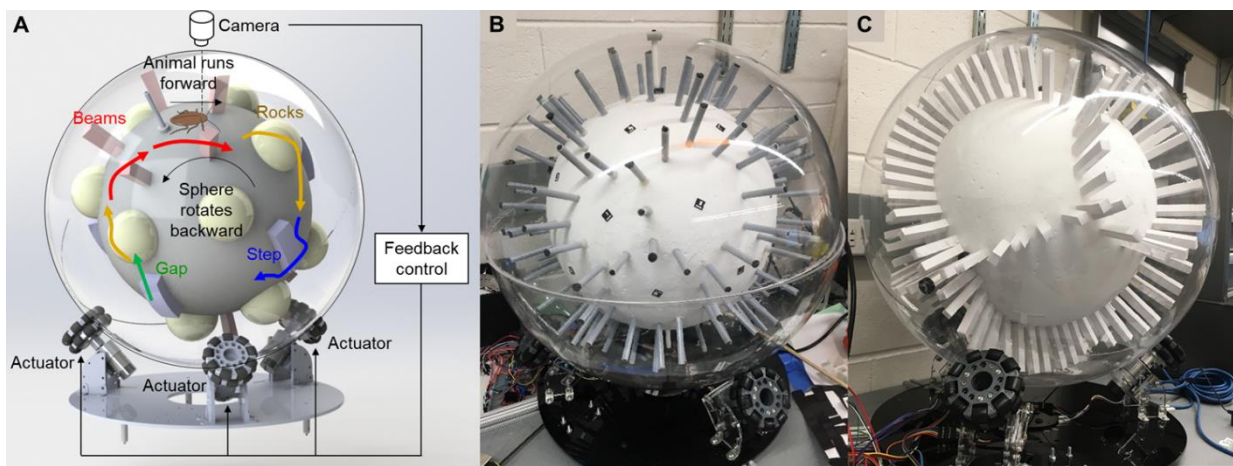

55

56 **Fig. 1. Terrain treadmill.** (A) Design of terrain treadmill. Colored elements show example modular terrain  
57 that can be used. (B, C) Terrain treadmill, with (B) sparsely and (C) densely spaced vertical pillars as  
58 example terrain modules. ArUCo markers attached on the inner sphere are also shown in (B).

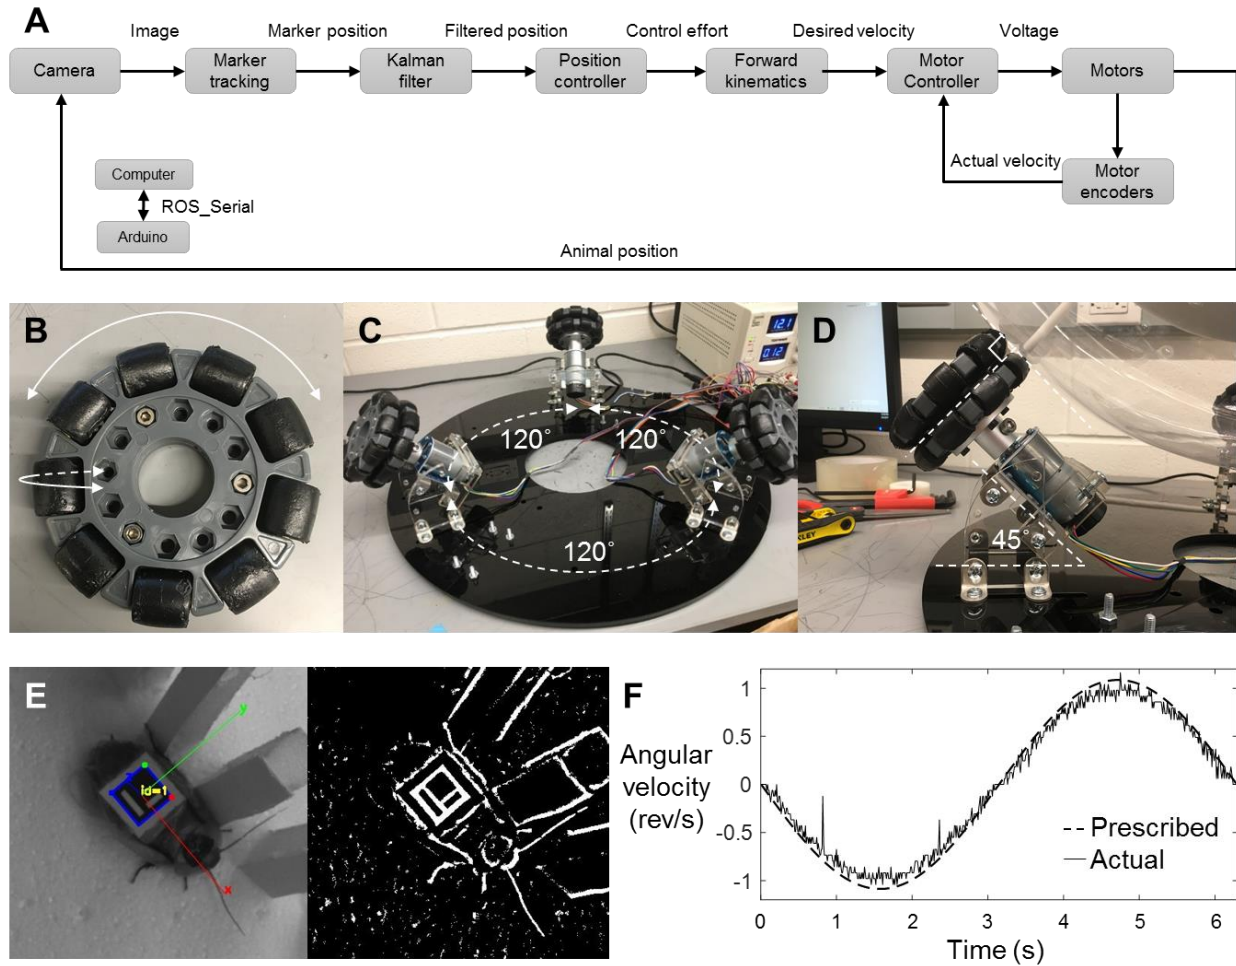

59

60 **Fig. 2. Overview of treadmill actuation and control system.** (A) Block diagram of treadmill's control  
61 system. (B) Omni-directional wheel. Large arrow shows rotation of the entire wheel; small arrow shows  
62 rotation of the small roller. (C) Treadmill actuator system consisting of omni-wheels mounted on DC  
63 motors. Each of the three circularly arranged actuators are  $120^\circ$  apart. (D) Inclination of motor-omni-wheel  
64 assembly relative to the base. Omni-wheel of each actuator is perpendicular to the transparent outer sphere.  
65 (E) Automated tracking of animal position using an ArUCo marker. Left: visible light camera view. Right:  
66 extracted outline using image processing. (F). Comparison of prescribed (dashed) and actual (solid) angular  
67 velocity of the sphere as a function of time during a simple rotation about a fixed axis.

68

69 **Results**

70 *Free locomotion at large spatiotemporal scales*

71 We tested the terrain treadmill's performance in eliciting sustained locomotion of discoid  
72 cockroaches ( $N = 5$  animals,  $n = 12$  trials, sparse obstacles) through both sparse (Fig. 1B) and cluttered  
73 (Fig. 1C) pillar obstacles (see 'Experimental validation using pillar obstacle field'). Even with cluttered  
74 obstacles, where gaps between obstacles were smaller than animal body width, we were able to elicit  
75 continuous trials, in which the animal moved through pillars for 25 minutes ( $\approx 2500$  stride cycles) over 67  
76 m ( $\approx 1500$  body lengths) (Video 2). For 83% of the experiment duration, the terrain treadmill contained the  
77 animal within a circle of radius 4 cm (0.9 body length) centered about the image center (Fig. 3) even at  
78 locomotion speeds of up to 10 body length/s (peak speed of 50 cm/s). We implemented a Kalman filter<sup>28</sup> to  
79 estimate the position of animal and reduce the noise and error in marker tracking (see Supplementary Text).  
80 The Kalman filter continued to estimate the animal's position even when the marker was obscured from  
81 body rolling (Fig. 5A) or the outer sphere's seam (Videos 1, 2). In addition, over the course of 12 trials, the  
82 animal freely explored and visited almost the entire obstacle field (Fig. 5G, H). Finally, the animal's motion  
83 relative to the treadmill was used to estimate metrics such as body velocity components (Fig. 6A-C),  
84 antenna planar orientation relative to the body heading (Fig. 6E), and unwrapped 2-D trajectories (Fig. 6D).

85

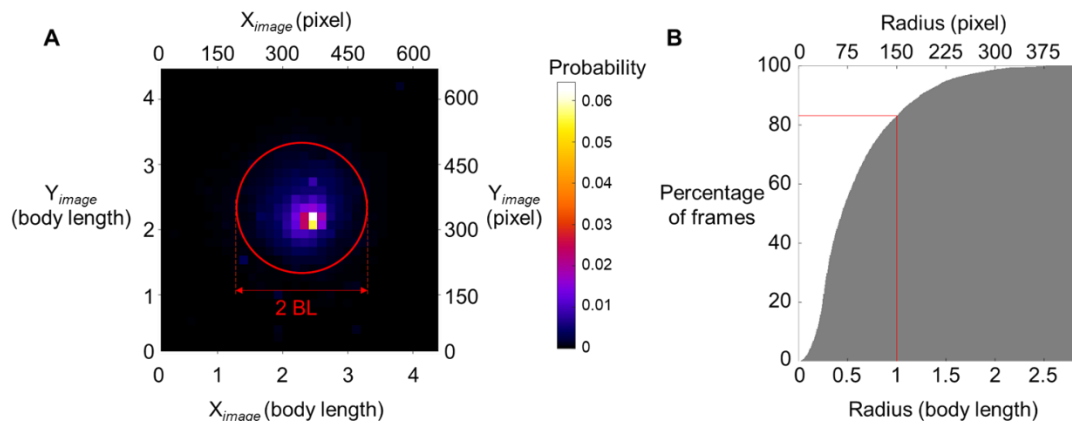

87 **Fig. 3. Performance of the treadmill.** (A) Probability of animal's detected location in the image. Red  
88 circle of radius 2 animal body lengths is centered at the image center. (B) Cumulative histogram of animal's

89 radial position (in body lengths) from the center of the image. Vertical and horizontal red lines show a  
90 radius of red circle in (A) and the percentage of frames in which animal's position was maintained within  
91 this circle.  $N = 5$  animals,  $n = 12$  trials.

## 92 *Animal-obstacle interaction*

93 We measured and reconstructed the animal-terrain interaction for 12 trials in which the animal  
94 freely explored the sparse obstacle field (Fig. 5, Videos 4, 5). The ArUCo markers attached on the animal  
95 and the inner sphere, allowed measuring and reconstructing animal motion relative to obstacle field (see  
96 'Measuring animal movement in obstacle field' in Methods). Because lighting was not optimized, the pillar  
97 shadow resulted in substantial variation of the background, and because the left and right antenna are  
98 visually similar and often moved rapidly, automated antenna tracking was accurate in only  $\approx 40\%$  of frames  
99 after rejecting inaccurately tracked data (see 'Automated animal tracking' in Methods). However, this can  
100 be improved with refinement of our experimental setup in future (see Discussion).

101 We then detected which pillar the animal's antennae contacted (Fig. 5 E, F, Video 4) by measuring  
102 the minimum distance from each antenna to all nearby pillars. To determine which pillar the antenna  
103 interacted with, we determined whether any pillars were within 3 cm from both antennae and which among  
104 them were closest to both antennae. We also manually identified the antenna pillar contact, which served  
105 as the ground truth. The antenna-pillar contact detected automatically was accurate in over 70% of the  
106 contact instances (Fig. 5I).

## 107 *Multiple behaviors and behavioral transitions*

108 In addition to walking or running while freely exploring the obstacle field, the animal displayed  
109 other behaviors during interaction with the terrain. For example, when moving in dense obstacle field, the  
110 animal often rolled its body in to the narrow gap between the pillars (Fig. 5A) to traverse and occasionally  
111 climbed up the pillars (Fig. 5B). In sparse obstacle field, the animal often swept its antennae during free

112 exploration (Fig. 5C, Fig. 6E). The animal also transitioned between these behaviors and occasionally  
113 stopped moving (Video 2, 3).

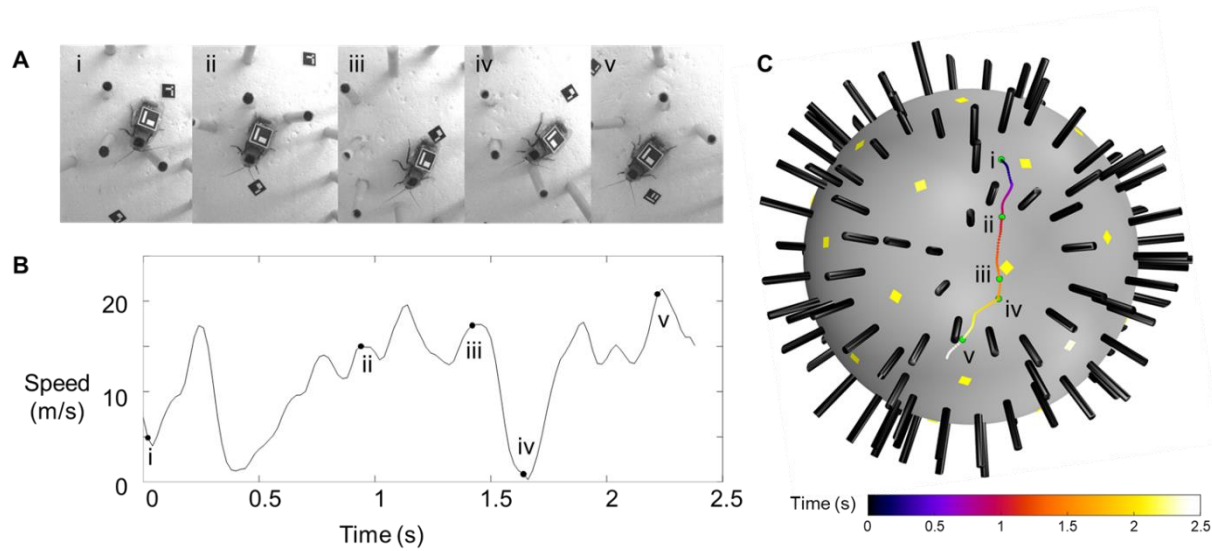

114

115 **Fig. 4. Performance of terrain treadmill.** (A) Snapshots of a discoid cockroach traversing vertical pillar  
116 obstacle field. (B) Speed of animal as a function of time. (C) Animal trajectory in obstacle field. Colored  
117 curve shows animal position in obstacle field as a function of time. Black and green dots in (B) and (C)  
118 respectively correspond to the snapshots (i-v) in (A).

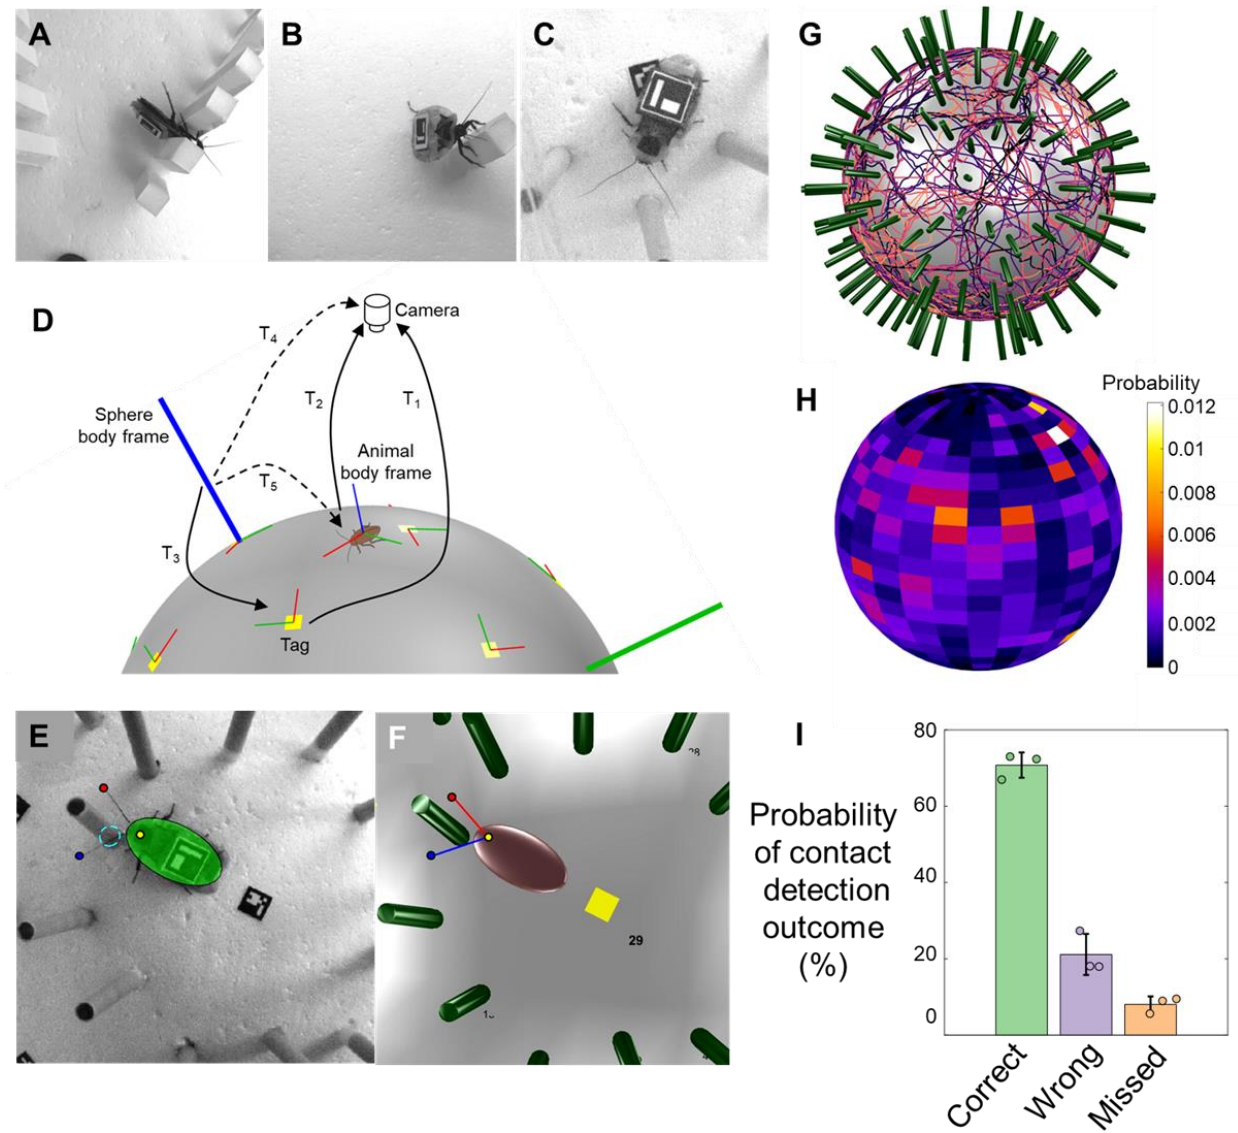

119

120 **Fig. 5. Animal behavior and 3-D reconstruction.** (A-C) Representative snapshots of behavior such as  
121 (A) body rolling, (B) body pitching and pillar climbing, and (C) antennal sensing observed during free  
122 exploration of terrain. (D) Coordinate frame transformation to measure animal motion relative to sphere.  
123 Solid black arrows are relative 3-D poses ( $T_1$ ,  $T_2$  and  $T_3$ ) that are known or measured directly from acquired  
124 images. Dashed arrows are the two relative 3-D poses ( $T_4$  and  $T_5$ ) that are calculated from measurements  
125 to obtain animal motion relative to the sphere. Yellow squares with red and green lines show the markers  
126 attached to the sphere and their  $x$  and  $y$  axes, respectively. Thick green and blue lines show the  $y$  and  $z$  axes  
127 of the frame attached to the inner sphere. (D, E) Representative snapshot and reconstruction of animal



128 moving through sparse pillar obstacle field. Transparent green ellipsoid in (D) and brown ellipsoid in (E)  
129 show approximated animal body. Red and blue dots show antenna tips. Yellow dot shows the tracked point  
130 on animal's head. Dashed cyan circle is the base of the two pillars with which the animal's antenna is  
131 interacting. (G, H) Ensemble of trajectories (G) and probability density distribution of animal center of  
132 mass (H) during free exploration of sparse pillar obstacle field,  $N = 5$  animals,  $n = 12$  trials. (I) Accuracy  
133 of antenna-pillar contact detection outcomes,  $N = 3$  animals,  $n = 3$  trials.

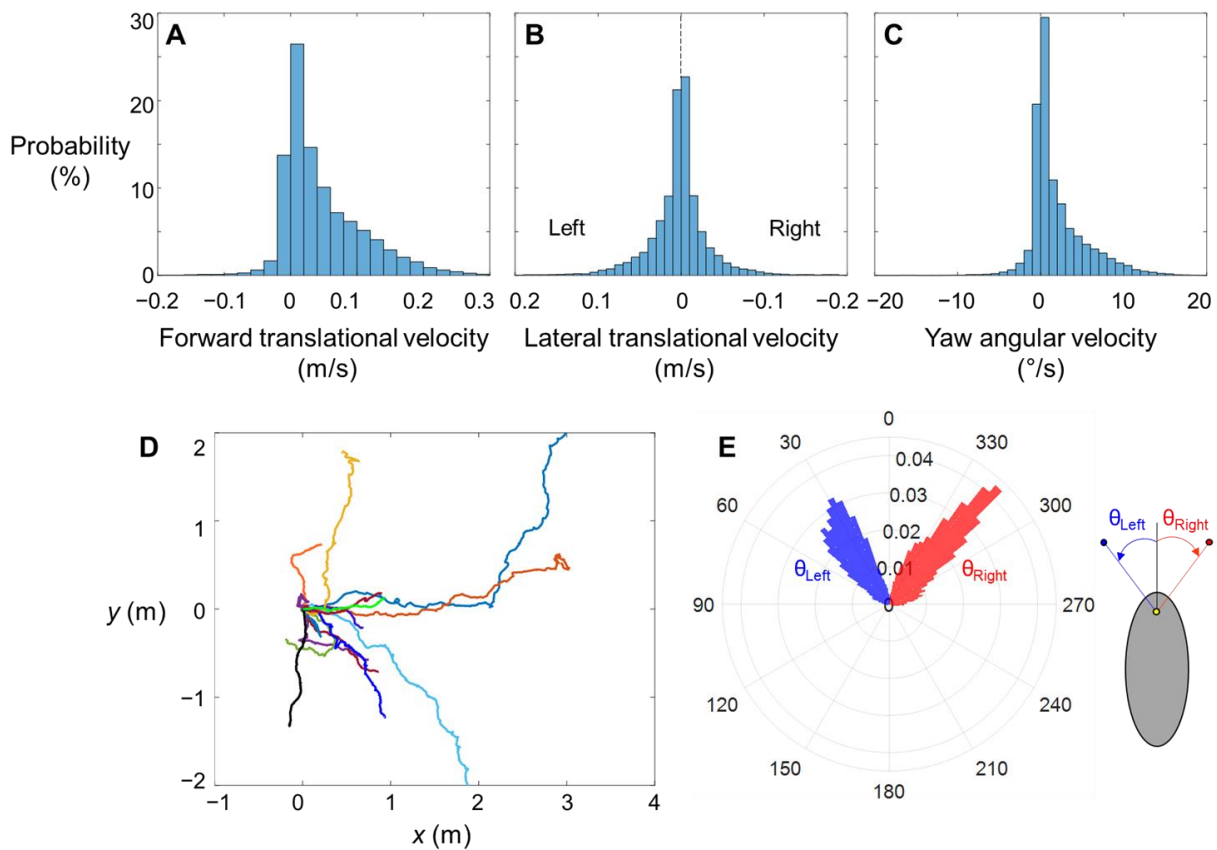

134  
135 **Fig. 6. Representative metrics of animal exploring sparse pillar obstacle field.** (A-C) Histogram of  
136 animal's (A) forward and (B) lateral translational velocities and (C) yaw angular velocity. (D) Unwrapped  
137 2-D trajectories of animal, obtained by integrating forward and lateral translational velocities and yaw  
138 angular velocity over duration of trial. (E) Histogram of left ( $\theta_{\text{left}}$ , blue) and right ( $\theta_{\text{right}}$ , red) antenna planar  
139 orientation relative to body heading (see schematic on right for definition).  $N = 3$  animals,  $n = 3$  trials. Each

140 trial has multiple trajectories starting from origin due to sections of trial not being tracked, with the next  
141 sections starting from origin.

## 142 **Discussion**

143 We created a reconfigurable laboratory platform for large spatiotemporal scale measurements of  
144 small animal locomotion through complex terrain with large obstacles (see ‘Manufacturing of concentric  
145 spheres’ and ‘Actuation system’ in Methods). Compared to existing locomotion arenas, our device  
146 increased the limits of experiment duration by  $\sim 100\times$  and traversable distance by  $\sim 100\times$ . Such large  
147 spatiotemporal scales may be useful for studying spatial navigation and memory<sup>29,30</sup> in terrain with large  
148 obstacles, and the larger spatial resolution may be useful for studying interaction of the animal (body,  
149 appendages, sensors) with the terrain in detail<sup>31,32</sup>. There may also be opportunities to advance  
150 neuromechanics of large obstacle traversal by combining the terrain treadmill with miniature wireless data  
151 backpacks<sup>33</sup> for studying muscle activation<sup>13</sup> and neural control<sup>34,35</sup>. The treadmill design may be scaled  
152 down or up to suit animals (or robots) of different sizes. Our treadmill enables large spatiotemporal scale  
153 studies of how locomotor behavior emerges from neuromechanical interaction with terrain with large  
154 obstacles.

155 Our study is only a first step and the terrain treadmill can use several improvements in the future  
156 to realize its potential. First, we will add more cameras from different views to minimize occlusions and  
157 diffused lighting from different directions to minimize shadows, as well as increase camera frame rate to  
158 accommodate rapid antenna and body movement, to achieve more reliable tracking of the animal body and  
159 antenna through cluttered obstacles during which 3-D body rotations are frequent. Second, feedback control  
160 of the sphere can be improved to use not only position but also velocity of the animal to better maintain it  
161 on top. This will be particularly useful if the animal suddenly accelerates or decelerates when traversing  
162 obstacles. Furthermore, for longer duration experiments, animal could be perturbed when at rest to elicit  
163 movement by automatically moving the treadmill. Finally, we need to take into account how locomotion

164 on the spherical treadmill may affect the animal's sensory cues as compared to moving on stationary ground  
165 <sup>36</sup>.

166

## 167 **Methods**

### 168 *Manufacturing of concentric spheres*

169 The hollow, outer sphere was composed of two smooth, acrylic hemispherical shells of radius 30  
170 cm and thickness 0.7 cm (custom ordered from Spring City Lighting, PA, USA; Fig. S2A). The solid, inner  
171 sphere was made of Styrofoam (Shape Innovation, GA, USA) and measured 20 cm in radius (Fig. S2A).  
172 Both spheres were arranged concentrically using a rigid connecting rod passing through the sphere centers,  
173 with a 10 cm space between surfaces of both spheres. To ensure that the connecting rod passed exactly  
174 through both sphere centers, we made custom support structures (Fig. S2B, C) to precisely drill through  
175 both the inner and outer spheres. The inner sphere was secured to the connecting rod using shaft collars on  
176 both sides (Fig. S2A, i). The ends of the connecting rod had threaded holes for the outer hemispheres to be  
177 screwed on to it (Fig. S2A, ii). The two outer hemispheres were then mated and sealed using clear tape  
178 (3M, MN, USA) without any protrusions to interfere with rotation and with minimal occlusions to the  
179 camera's view.

### 180 *Actuation system*

181 The actuation system design followed that of a ballbot <sup>37</sup> (but inverted) and consists of three DC  
182 motors mounted on a rigid base, with a set of omni-directional wheels (Fig. 2B-D, Nexus Robots) mounted  
183 to each motor. Each set of omni-directional wheel has two parallel wheels which can rotate like a normal  
184 wheel about the motor axis. On the rim of each parallel wheel are nine rollers, each of which can rotate  
185 about an axis that is perpendicular to the motor axis and tangential to the wheel rim (Fig. 2B). We coated  
186 the rollers with a layer of protective rubber (Performix Plasti Dip) to reduce their chance of scratching the  
187 transparent outer sphere. The three motors were equally spaced around the base (Fig. 2C) and tilted by 45°

188 (Fig. 2D). The tilt angle was chosen based on the size of the base to allow each omni-directional wheel to  
189 be perpendicular to the sphere at the point of contact (Fig. 2D), which reduces vibration and simplifies  
190 actuation kinematics. Each DC motor also had an encoder to measure and control its rotation speed and was  
191 powered from a 12 V DC power supply.

### 192 *Actuation kinematics*

193 To measure the relation between the inner/outer spheres rotation and motor rotation, we adapted  
194 ballbot's kinematic model<sup>37</sup>. The desired translational and rotational velocity of the outer sphere's topmost  
195 point, and the required motor angular velocities are related as follows:

$$196 \quad v_{s1} = -v_y \cos\phi - R \sin\phi\omega_z \quad (1)$$

$$197 \quad v_{s2} = \left(\frac{\sqrt{3}}{2} v_x + \frac{1}{2} v_y\right) \cos\phi - R \sin\phi\omega_z \quad (2)$$

$$198 \quad v_{s3} = \left(-\frac{\sqrt{3}}{2} v_x + \frac{1}{2} v_y\right) \cos\phi - R \sin\phi\omega_z \quad (3)$$

199 where  $v_{s1}$ ,  $v_{s2}$ ,  $v_{s3}$  are circumferential velocities of the three wheels,  $v_x$  and  $v_y$  are the fore-aft and lateral  
200 velocity components of the outer sphere's highest point,  $\omega_z$  is the angular velocity of the outer sphere about  
201 the  $z$  axis,  $\phi$  is the elevation angle of the contact point of each wheel with the outer sphere, and  $R$  is the  
202 radius of the outer sphere. See Fig. S4 for definition of geometric parameters.

### 203 *Automated animal tracking*

204 To track the animal's body and antenna movement, we modified existing automated tracking  
205 methods. We attached an ArUCo marker<sup>27</sup> on the animal body to track its pose. We chose ArUCo markers  
206 because it is feasible for real-time tracking required for fast actuation to keep the animal on top of the  
207 treadmill and it can be used to infer 3-D position and orientation using only one camera (Fig. 2E). Prior to  
208 each experiment, we adjusted camera position and lens focus to ensure that the topmost point of the inner  
209 sphere was in focus. We then calibrated the camera using ArUCo software. Using the calibrated camera,  
210 the ArUCo marker on the animal was tracked in real time at 50 Hz.

211 We used DeepLabCut<sup>38</sup> to track the animal's head and both antennae tips during post processing.  
212 We first manually annotated the antenna tips and animal head center in 20 frames each from nine trials,  
213 which we used as the sample to train a neural network. The antenna and head positions were then tracked  
214 by the trained network (Fig. 5E). We automatically removed some of the obviously incorrect tracking  
215 results such as left and right antenna being flipped and obstacles detected as antennae.

#### 216 *Controlling treadmill motion*

217 The device used a computer running Robot Operating System (ROS, version: Indigo)<sup>39</sup> to record  
218 and track the animal (ArUCo marker), control outer sphere actuation, and collect data (Fig. 2A). We used  
219 an overhead camera (PointGrey Flea3) to record animal motion in real time. First, an image was taken by  
220 the camera as the animal moved on the inner sphere. This image was used to track the animal's position by  
221 detecting the ArUCo marker on animal body. Next, the animal position was filtered using a constant  
222 velocity model Kalman filter<sup>28</sup> (see Supplementary Text), which reduced measurement noise to improve  
223 accuracy of animal's estimated position. In addition, the Kalman filter also estimated the animal's position  
224 when the animal marker was temporarily occluded by obstacles or was not tracked in real time.

225 Using the filtered position data, a PID position controller calculated the translational and rotational  
226 velocities of the outer sphere's highest point that must be compensated for (control effort) to keep the animal  
227 centered on top of the inner sphere (Videos 1, 2). To do so, the controller minimized the error between the  
228 position of the marker and the center of the camera viewing area (i.e., the point of the inner sphere directly  
229 below the camera's line of sight). We then used the used actuation kinematics (equations (1)-(3)) to  
230 determine the motor rotation velocities required to rotate the outer sphere to generate an opposite velocity  
231 to that of the animal. Finally, the calculated motor velocities were sent from the computer to an Arduino  
232 Due microcontroller, which was used to actuate the motors (via H-bridge motor drivers) to generate the  
233 desired rotation. We implemented a PID velocity controller for each motor which measured the motor speed  
234 (via the motor encoder) to ensure that desired motor speed was reached.

#### 235 *Tuning for robust treadmill performance*

236           Several aspects of the device must be tuned to ensure that the animal remained on top of the inner  
237 sphere regardless of its motion relative to the treadmill. First, an appropriate lens focal length and shutter  
238 time should be chosen to obtain images with minimal blur for sufficiently fast and reliable marker tracking  
239 (Fig. 2E). With the camera placed above 1 m from the top of the inner sphere, we used a 16 mm lens  
240 (Fujinon) to obtain a view of sufficient resolution and a 5 ms shutter time to minimize motion blur. We then  
241 calibrated the camera using the checkerboard method.

242           In addition, camera frame rate should be adjusted to not exceed the marker detection rate for a  
243 given camera resolution; higher frame rates do not result in better performance if marker detection rate is  
244 the bottleneck. Because higher camera resolution increases computational time for marker detection, the  
245 smallest resolution that satisfies the other requirements is recommended. In our setup, a resolution of 688  
246 pixels  $\times$  700 pixels, marker detection can be performed at  $\approx$ 50 Hz (Videos 2, 4).

247           Furthermore, the Kalman filter parameters should be tuned to ensure that the animal's position is  
248 tracked sufficiently continuously and smoothly even when the animal accelerates or decelerates suddenly.  
249 We found that the most relevant parameter is the noise in the animal's state transition model (i.e., process  
250 covariance, see Supplementary Text). Finally, gains of the high-level position PID controller and low-level  
251 motor velocity PID controllers should be tuned to track desired treadmill motion as closely as possible  
252 while maintaining desired response characteristics such as low overshoot, quick settling time, etc. With  
253 tuning, the actuator system can rotate the sphere to achieve desired rotation trajectories accurately (Figs.  
254 2F, 4, Videos 1, 2).

#### 255 *Experimental validation using pillar obstacle field*

256           To demonstrate the treadmill's ability to elicit sustained free locomotion of the animal while  
257 physically interacting with the terrain, we implemented an obstacle field on the treadmill with tall pillars of  
258 a square cross-section of 1.2 cm with gaps between adjacent pillars smaller than the animal body width (Fig.  
259 1C, Video 2). Each rectangular pillar was made of Styrofoam and covered with cardstock on longer faces.

260 We then inserted one end of a toothpick into the pillar, glued them firmly. The other end was then inserted  
261 into the Styrofoam inner sphere and the pillar was firmly glued to the inner sphere using hot glue.

262         Following this, to develop a pipeline for measuring and reconstructing animal's physical interaction  
263 with the obstacles, we created an obstacle field with sparsely distributed cylindrical pillars (Figs. 1B, 4,  
264 Video 4). Each pillar consisted of a circular plastic tube of height 7 cm and diameter 1 cm, filled with  
265 polystyrene foam. To generate an infinitely repeatable obstacle field, we placed the pillars on the inner  
266 sphere in a soccer ball pattern. At both ends and midpoint of each edge of the soccer ball pattern, we  
267 installed a pillar normal to the spherical surface, with each pillar 4 cm apart from one another. We installed  
268 the pillars using technique described above. The supporting rod passing through inner sphere, along with  
269 its two shaft collars, also served as two additional pillars of diameter 1.25 cm and height 10 cm, with a  
270 cylindrical base of diameter 2.2 cm and height 1 cm.

#### 271 *Experiment and data collection*

272         We used discoid cockroaches (*Blaberus discoidalis*) to test the treadmill's ability to elicit free  
273 locomotion and measure animal-terrain interaction over large spatiotemporal scales. We put the animal  
274 inside the outer sphere and then sealed it. To pick and place the animal onto the inner sphere, we attached  
275 a square magnet (16mm side length, 3.5g) on the animal's dorsal side, with an ArUCo marker attached to  
276 it for tracking (Fig. 2E, 3). We used a larger magnet to pick up and move the animal to the top of the  
277 treadmill and dropped it onto the inner sphere.

278         We then started the control program to keep the animal on top. The images recorded by the camera  
279 were then sent to the ROS program, which first saved each frame in its native format (a bagfile) and then  
280 processed the image to track the marker position. Based on the tracked and then filtered marker position,  
281 which were used to calculate the velocity of the animal through forward kinematics, motor velocities  
282 required to keep the animal centered on were calculated and commanded to the motors. After each  
283 experiment, the bagfiles were retrieved and processed using custom MATLAB code to extract the saved  
284 images for post processing.

285 *Measuring animal movement in obstacle field*

286 To measure the animal's movement relative to the pillar obstacle field, we first measured the  
287 movement of the pillar obstacle field (i.e., treadmill rotation) relative to the camera. We attached 31 ArUCo  
288 markers to the inner sphere, with one each at the center of hexagonal and pentagonal regions of the soccer  
289 ball pattern projected on the sphere (Fig. S4). We then separately created a map of all markers attached on  
290 the inner sphere (referred to as marker map, Fig. S4, right) using ArUCo Marker-mapper application.  
291 Because each marker and its four corners were fixed relative to the coordinate frame attached to the inner  
292 sphere (i.e.,  $T_3$  is known, Fig. 5D), when one of the markers on sphere is tracked (i.e.,  $T_1$  can be measured,  
293 Fig. 5D), the relative pose between sphere body frame and the camera (Fig. 5D,  $T_4$ ) can be computed. When  
294 more than one marker on the sphere is detected, relative pose of sphere and camera can be computed by  
295 solving the Perspective- $n$ -points problem <sup>40</sup>, which estimates camera pose from a known set of 3D points  
296 (marker corners) and the corresponding 2D coordinates in the image. The 'solvePnP' program in image  
297 processing toolboxes in MATLAB or OpenCV may be used to for this purpose. Because the animal's  
298 movement relative to the camera (Fig. 5D,  $T_2$ ) is directly available from tracking via the calibrated camera,  
299 the animal's pose relative to the sphere body frame and hence relative to the terrain obstacle field can be  
300 calculated (Fig. 5D,  $T_5$ ). Because the ArUCo marker attached to the animal is not necessarily at its center  
301 of mass, a constant position and orientation offset must be manually determined and added.

302 *Unwrapped 2-D trajectory*

303 Considering that the sphere diameter is  $\approx 9\times$  that of animal body length, we approximated the  
304 immediate region surrounding the animal to be flat and estimated the animal's equivalent 2-D planar  
305 trajectory. To obtain the 2-D trajectory, we integrated the body forward and lateral translational velocities  
306 and body yaw angular velocity (Fig. 6A-C) over time, with the initial position at origin and body forward  
307 axis along  $x$  axis. Because during portions of a trial the animal body marker was not tracked for a long  
308 duration, we did not consider those video frames. As a result, each trial was assumed to be composed of



309 multiple segments, and each of their equivalent 2-D trajectories were assumed to have the same initial  
310 conditions as described above (Fig. 6D).

### 311 *Maintenance*

312 To prevent occlusions and allow reliable camera tracking, the transparent outer sphere must be  
313 wiped clean after every use to remove any smudges off the surface. Because wiping with regular cloth  
314 towels may scratch the outer sphere, we used a microfiber cloth (AmazonBasics) with soap and water. In  
315 addition, we used acrylic cleaner to repair small scratches and dry lubricant (WD-40) to remove tape  
316 residue.

317

### 318 **Data Availability**

319 CAD models, codes for real time control and postprocessing, and data are available at  
320 [https://github.com/TerradynamicsLab/terrain\\_treadmill](https://github.com/TerradynamicsLab/terrain_treadmill).

321

### 322 **Acknowledgements**

323 We thank Frank Cook and Rich Middlestadt at the Johns Hopkins University Whiting School of  
324 Engineering Manufacturing Facility for assistance with mechanical fabrication, Rafael de la Tijera Obert  
325 and Hongtao Wu for installing pillars, and Noah Cowan for discussion.

326

### 327 **Author contributions**

328 R.O implemented 2-D tracking and 3-D reconstruction, analyzed data, created visualizations, and  
329 wrote the paper; B.S. designed and constructed the treadmill, implemented the treadmill control system,  
330 and wrote an early draft; Y.H. designed the treadmill and assisted construction; E.F collected animal data

331 for testing treadmill performance; C.L. oversaw the study, designed the treadmill, created visualizations,  
332 and wrote the paper.

333

### 334 **Competing interests**

335 The authors declare no competing or financial interests.

336

### 337 **Funding**

338 This research was supported by a Beckman Young Investigator award from the Arnold & Mabel  
339 Beckman Foundation and The Johns Hopkins Whiting School of Engineering startup funds to C.L., and an  
340 NSF Research Experience for Undergraduates (REU) Award in Computational Sensing and Medical  
341 Robotics to B.S.

342

### 343 **Supplementary information**

344 Supplementary information available online at XX.

345

### 346 **References**

- 347 1. Dickinson, M. H. *et al.* How animals move: An integrative view. *Science* **288**, 100–106 (2000).
- 348 2. Kaspari, M, Weiser, M. D., Kaspari, M. & Weiser, M. D. M. The Size-Grain Hypothesis and  
349 Interspecific Scaling in Ants. *Funct. Ecol.* **13**, 530–538 (1999).
- 350 3. Cavagna, G. A., Thys, H. & Zamboni, A. The sources of external work in level walking and  
351 running. *J. Physiol.* **262**, 639–657 (1976).
- 352 4. Alexander, R. M. N. & Jayes, A. S. A dynamic similarity hypothesis for the gaits of quadrupedal

- 353 mammals. *J. Zool.* **201**, 135–152 (1983).
- 354 5. Full, R. J. & Tu, M. S. Mechanics of Six-Legged Runners. **146**, 129–146 (1990).
- 355 6. Blickhan, R. & Full, R. J. Similarity in multilegged locomotion: Bouncing like a monopode. *J.*  
356 *Comp. Physiol. A* **173**, 509–517 (1993).
- 357 7. Koditschek, D. E., Full, R. J. & Buehler, M. Mechanical aspects of legged locomotion control.  
358 *Arthropod Struct. Dev.* **33**, 251–272 (2004).
- 359 8. Spence, A. J., Revzen, S., Seipel, J., Mullens, C. & Full, R. J. Insects running on elastic surfaces.  
360 *J. Exp. Biol.* **213**, 1907–1920 (2010).
- 361 9. Spagna, J. C., Goldman, D. I., Lin, P.-C., Koditschek, D. E. & Full, R. J. Distributed mechanical  
362 feedback in arthropods and robots simplifies control of rapid running on challenging terrain.  
363 *Bioinspir. Biomim.* **2**, 9–18 (2007).
- 364 10. Li, C., Hsieh, S. T. & Goldman, D. I. Multi-functional foot use during running in the zebra-tailed  
365 lizard (*Callisaurus draconoides*). *J. Exp. Biol.* **215**, 3293–3308 (2012).
- 366 11. Blaesing, B. & Cruse, H. Stick insect locomotion in a complex environment: Climbing over large  
367 gaps. *J. Exp. Biol.* **207**, 1273–1286 (2004).
- 368 12. Kohlsdorf, T. & Biewener, A. A. Negotiating obstacles: Running kinematics of the lizard  
369 *Sceloporus malachiticus*. *J. Zool.* **270**, 359–371 (2006).
- 370 13. Sponberg, S. & Full, R. J. Neuromechanical response of musculo-skeletal structures in  
371 cockroaches during rapid running on rough terrain. *J. Exp. Biol.* **211**, 433–446 (2008).
- 372 14. Harley, C. M., English, B. A. & Ritzmann, R. E. Characterization of obstacle negotiation  
373 behaviors in the cockroach, *Blaberus discoidalis*. *J. Exp. Biol.* **212**, 1463–1476 (2009).
- 374 15. Daley, M. A. & Biewener, A. A. Running over rough terrain reveals limb control for intrinsic  
375 stability. *Proc. Natl. Acad. Sci.* **103**, 15681–15686 (2006).

- 376 16. Othayoth, R., Xuan, Q., Wang, Y. & Li, C. Locomotor transitions in the potential energy  
377 landscape-dominated regime. *Proc. R. Soc. B* **288**, rspb.2020.2734 (2021).
- 378 17. Watson, J. T. & Ritzmann, R. E. Leg kinematics and muscle activity during treadmill running in  
379 the cockroach, *Blaberus discoidalis*: II. Fast running. *J. Comp. Physiol. A* **182**, 23–33 (1997).
- 380 18. Weinstein, R. B. & Full, R. J. Intermittent locomotion increases endurance in a gecko. *Physiol.*  
381 *Biochem. Zool.* **72**, 732–739 (1999).
- 382 19. Full, R. J. Locomotion energetics of the ghost crab: I. Metabolic cost and endurance. *J. Exp. Biol.*  
383 **153**, 137–153 (1987).
- 384 20. Herreid, C. F. & Full, R. J. Cockroaches on a treadmill: Aerobic running. *J. Insect Physiol.* **30**,  
385 395–403 (1984).
- 386 21. Kram, R., Griffin, T. M., Donelan, J. M. & Chang, Y. H. Force treadmill for measuring vertical  
387 and horizontal ground reaction forces. *J. Appl. Physiol.* **85**, 764–769 (1998).
- 388 22. Leblond, H., L’Espérance, M., Orsal, D. & Rossignol, S. Treadmill Locomotion in the Intact and  
389 Spinal Mouse. *J. Neurosci.* **23**, 11411–11419 (2003).
- 390 23. Voloshina, A. S., Kuo, A. D., Daley, M. a & Ferris, D. P. Biomechanics and energetics of walking  
391 on uneven terrain. *J. Exp. Biol.* **216**, 3963–3970 (2013).
- 392 24. Park, H. W., Wensing, P. M. & Kim, S. Online planning for autonomous running jumps over  
393 obstacles in high-speed quadrupeds. *Robot. Sci. Syst.* **11**, (2015).
- 394 25. Okada, J. & Toh, Y. The role of antennal hair plates in object-guided tactile orientation of the  
395 cockroach (*Periplaneta americana*). *J. Comp. Physiol. - A Sensory, Neural, Behav. Physiol.* **186**,  
396 849–857 (2000).
- 397 26. Bailey, S. A. Biomimetic Control With a Feedback Coupled Nonlinear Oscillator: Insect  
398 Experiments, Design Tools, and Hexapedal Robot Application Results. (2004).

- 399 27. Garrido-Jurado, S., Muñoz-Salinas, R., Madrid-Cuevas, F. J. & Marín-Jiménez, M. J. Automatic  
400 generation and detection of highly reliable fiducial markers under occlusion. *Pattern Recognit.* **47**,  
401 2280–2292 (2014).
- 402 28. Harvey, A. C. *Forecasting, structural time series models and the Kalman filter*. (Cambridge  
403 university press, 1990).
- 404 29. Varga, A. G., Kathman, N. D., Martin, J. P., Guo, P. & Ritzmann, R. E. Spatial Navigation and the  
405 Central Complex: Sensory Acquisition, Orientation, and Motor Control. *Front. Behav. Neurosci.*  
406 **11**, (2017).
- 407 30. Collett, M., Chittka, L. & Collett, T. S. Spatial memory in insect navigation. *Curr. Biol.* **23**, R789–  
408 R800 (2013).
- 409 31. Okada, J. & Toh, Y. Active tactile sensing for localization of objects by the cockroach antenna. *J.*  
410 *Comp. Physiol. A Neuroethol. Sensory, Neural, Behav. Physiol.* **192**, 715–726 (2006).
- 411 32. Cowan, N. J., Lee, J. & Full, R. J. Task-level control of rapid wall following in the American  
412 cockroach. *J. Exp. Biol.* **209**, 1617–1629 (2006).
- 413 33. Hammond, T. T., Springthorpe, D., Walsh, R. E. & Berg-Kirkpatrick, T. Using accelerometers to  
414 remotely and automatically characterize behavior in small animals. *J. Exp. Biol.* **219**, 1618–1624  
415 (2016).
- 416 34. Mongeau, J.-M., Sponberg, S. N., Miller, J. P. & Full, R. J. Sensory processing within cockroach  
417 antenna enables rapid implementation of feedback control for high-speed running maneuvers. *J.*  
418 *Exp. Biol.* **218**, 2344–54 (2015).
- 419 35. Watson, J. T., Ritzmann, R. E. & Pollack, A. J. Control of climbing behavior in the cockroach,  
420 *Blaberus discoidalis*. II. Motor activities associated with joint movement. *J. Comp. Physiol. A*  
421 *Neuroethol. Sensory, Neural, Behav. Physiol.* **188**, 55–69 (2002).

- 422 36. Van Ingen Schenau, G. J. Some fundamental aspects of the biomechanics of overground versus  
423 treadmill locomotion. *Medicine and Science in Sports and Exercise* **12**, 257–261 (1980).
- 424 37. Kumaga, M. & Ochiai, T. Development of a robot balanced on a ball &#x2014; Application of  
425 passive motion to transport &#x2014; *2009 IEEE Int. Conf. Robot. Autom.* 4106–4111 (2009).  
426 doi:10.1109/robot.2009.5152324
- 427 38. Mathis, A. *et al.* DeepLabCut: markerless pose estimation of user-defined body parts with deep  
428 learning. *Nat. Neurosci.* **21**, 1281–1289 (2018).
- 429 39. Quigley, M. *et al.* ROS: an open-source Robot Operating System. in *International Conference on*  
430 *Robotics and Automation* **3**, 5 (2009).
- 431 40. Lepetit, V., Moreno-Noguer, F. & Fua, P. EPnP: An accurate O(n) solution to the PnP problem.  
432 *Int. J. Comput. Vis.* **81**, 155–166 (2009).
- 433
